# Supplementary material for: Human Bone Marrow-Derived Mesenchymal Stromal Cells Reduce the Severity of Experimental Necrotizing Enterocolitis in a Concentration-Dependent Manner
Source: MDPI journal article supplement (doi:10.3390/cells12050760), 2023-02-27
Supplement: s1 [file s1]

**Table S1.** Term formula milk, human and mouse breast milk composition.

|                                                                                                      | <b>Term Infant formula</b> | <b>Human Breast Milk</b> | <b>Mouse Breast Milk</b> |
|------------------------------------------------------------------------------------------------------|----------------------------|--------------------------|--------------------------|
| Protein (g)                                                                                          | 1.5                        | 1.1                      | 9                        |
| Fat (g)                                                                                              | 3.4                        | 4.2                      | 13.1                     |
| Carbohydrates (g)                                                                                    | 7.8                        | 7                        | 3                        |
| Energy (kcal)                                                                                        | 68                         | 72                       | 171                      |
| Osmolality (mOsm/kg)                                                                                 | 213                        | ~ 300                    |                          |
| Values are calculated on 100mL of milk. g: gram; kcal: kilocalorie; kg: kilogram; mOsm: milliosmole. |                            |                          |                          |
