# Supplementary figures and images for: Human Bone Marrow-Derived Mesenchymal Stromal Cells Reduce the Severity of Experimental Necrotizing Enterocolitis in a Concentration-Dependent Manner
Source: MDPI journal article supplement (doi:10.3390/cells12050760), 2023-02-27

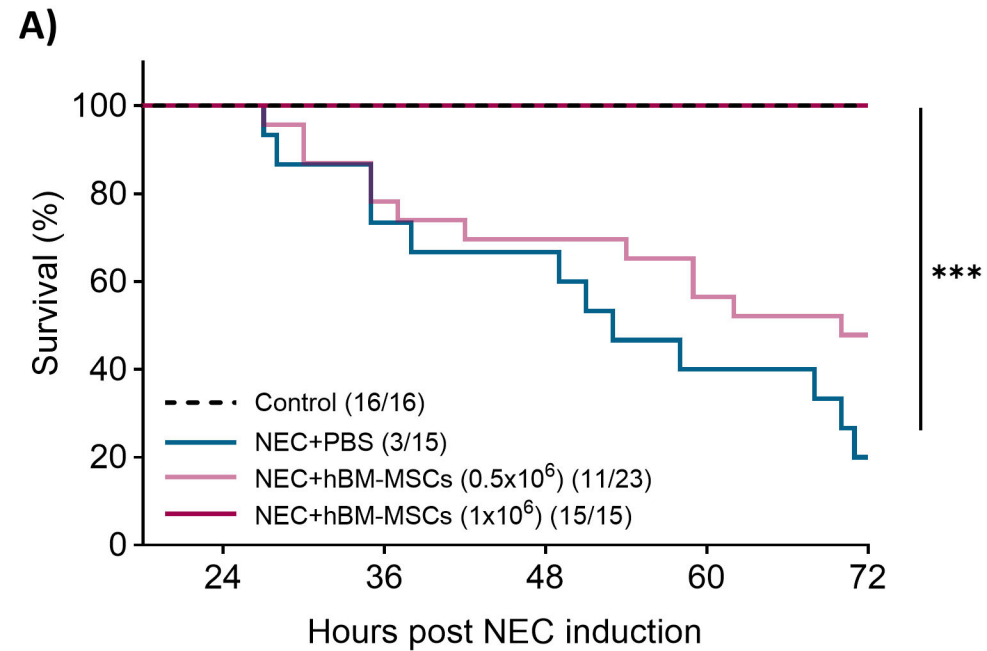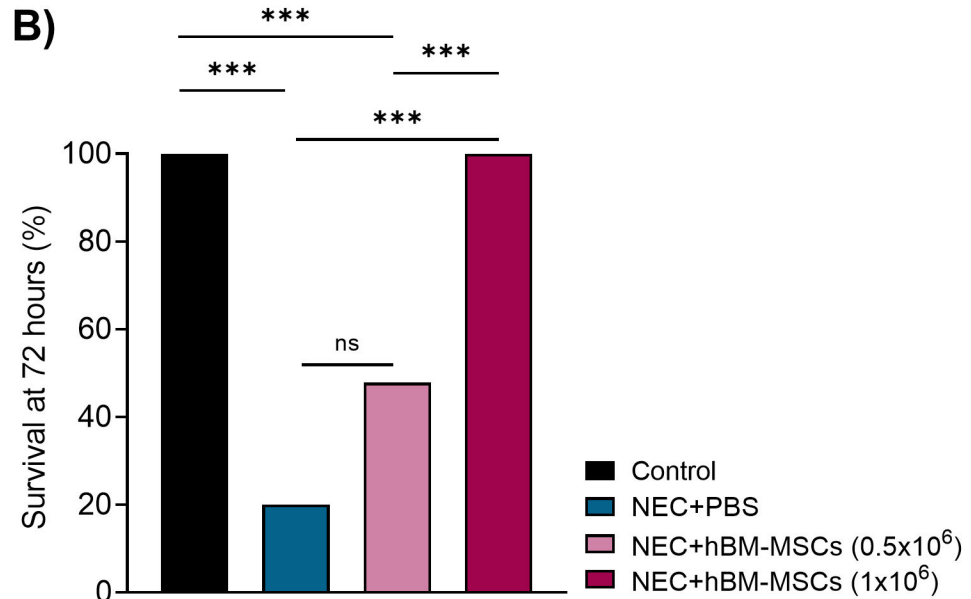

Supplement: s1 [file s1]

**A)**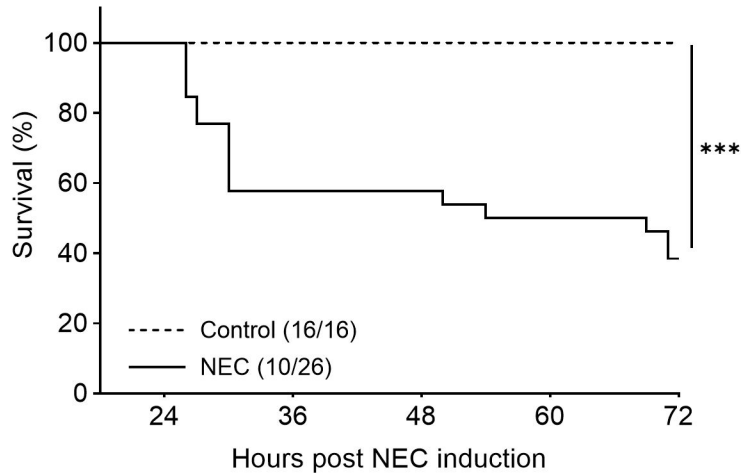**B)**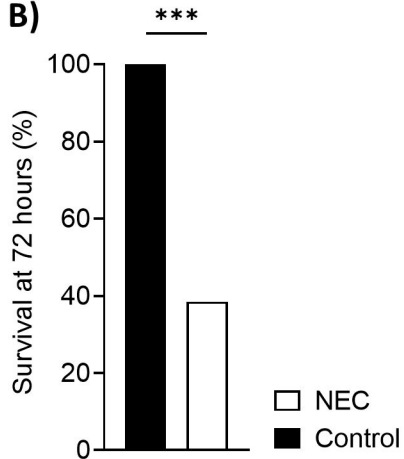

Supplement: s1 [file s1]
